# Supplementary material for: Evaluation of Antimicrobial and Anticancer Activities of Selected Medicinal Plants of Himalayas, Pakistan
Source: MDPI journal article supplement (doi:10.3390/plants11010048), 2021-12-24
Supplement: s1 [file s1]

Supplementary Data:

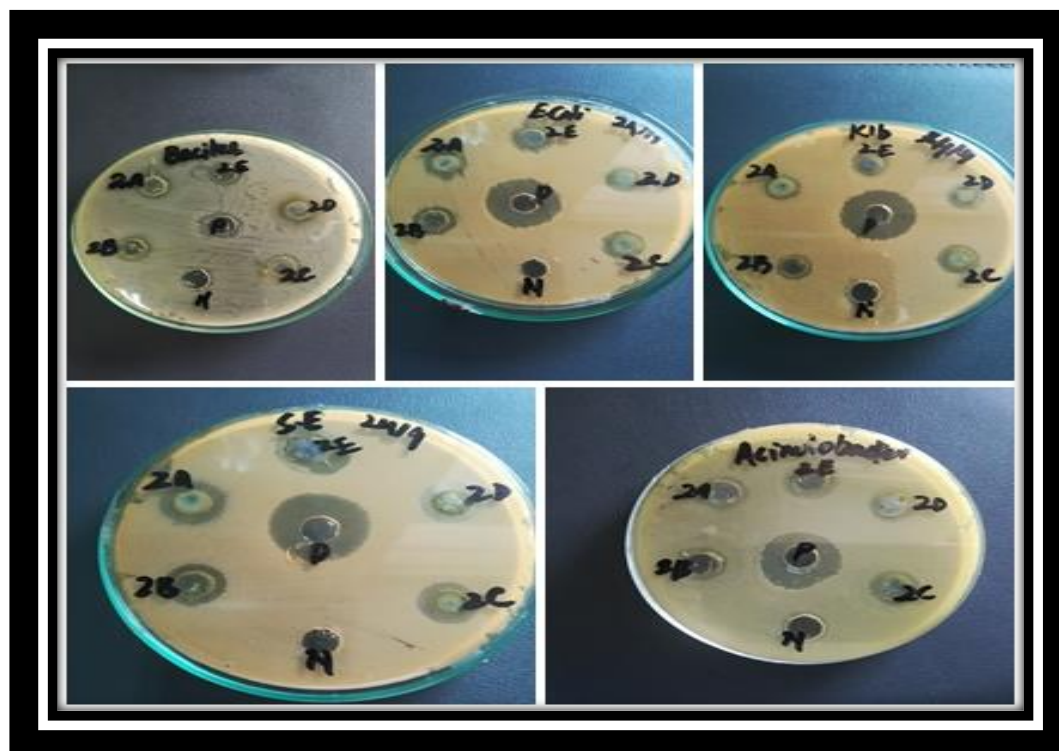

**Figure S1.** Antibacterial activity *Prunus cornuta* extracts against infectious bacterial species.

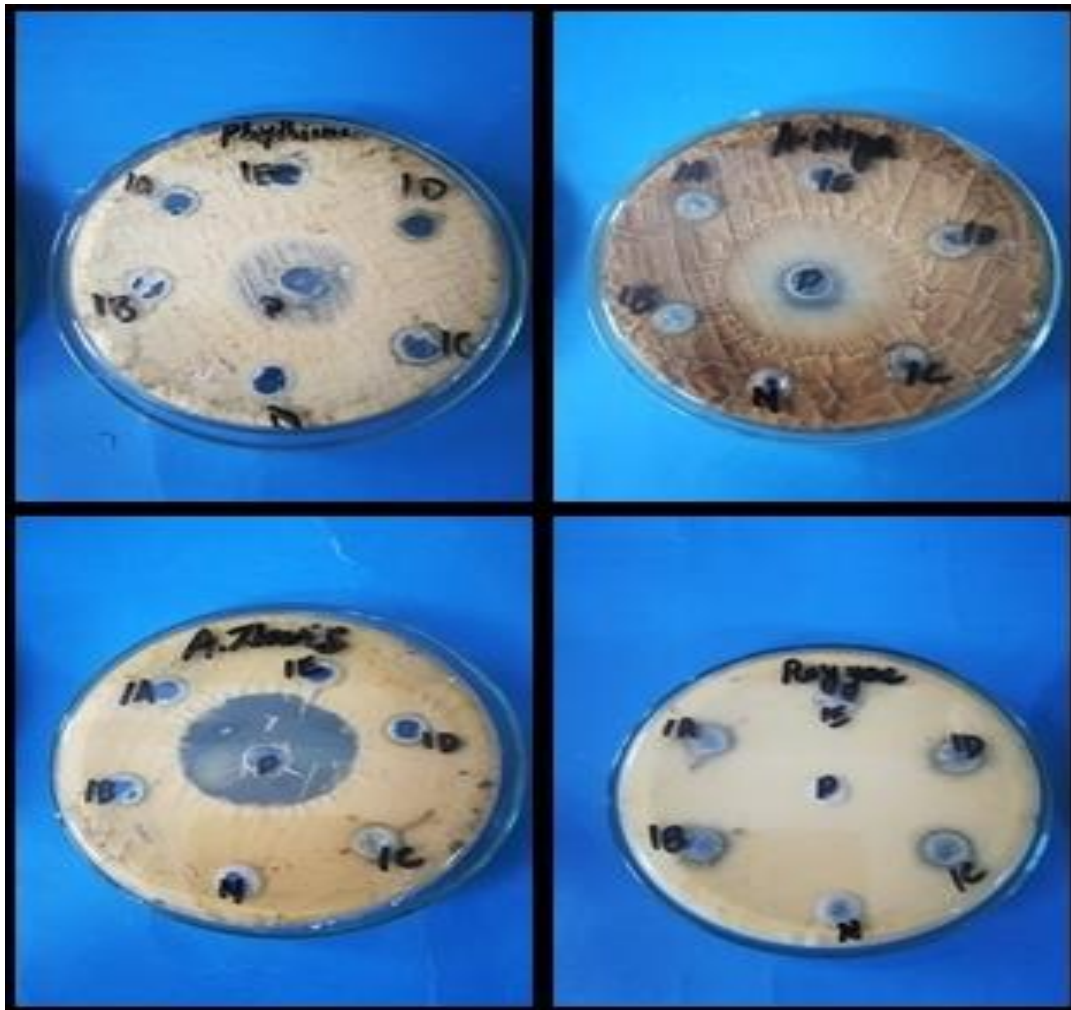

**Figure S2.** Fungal inhibition on SDA media by plant extracts in butanol, chloroform, ethyl acetate, methanol, and n-hexane extracts. *Pythium sp.1*, *A. niger*, *A. Flavous sp.* exhibited no significant inhibition except *Royzae sp.* with average 15 % inhibition by butanol, chloroform, ethyl acetate, methanol, and 0.0 % by n-hexane extracts.

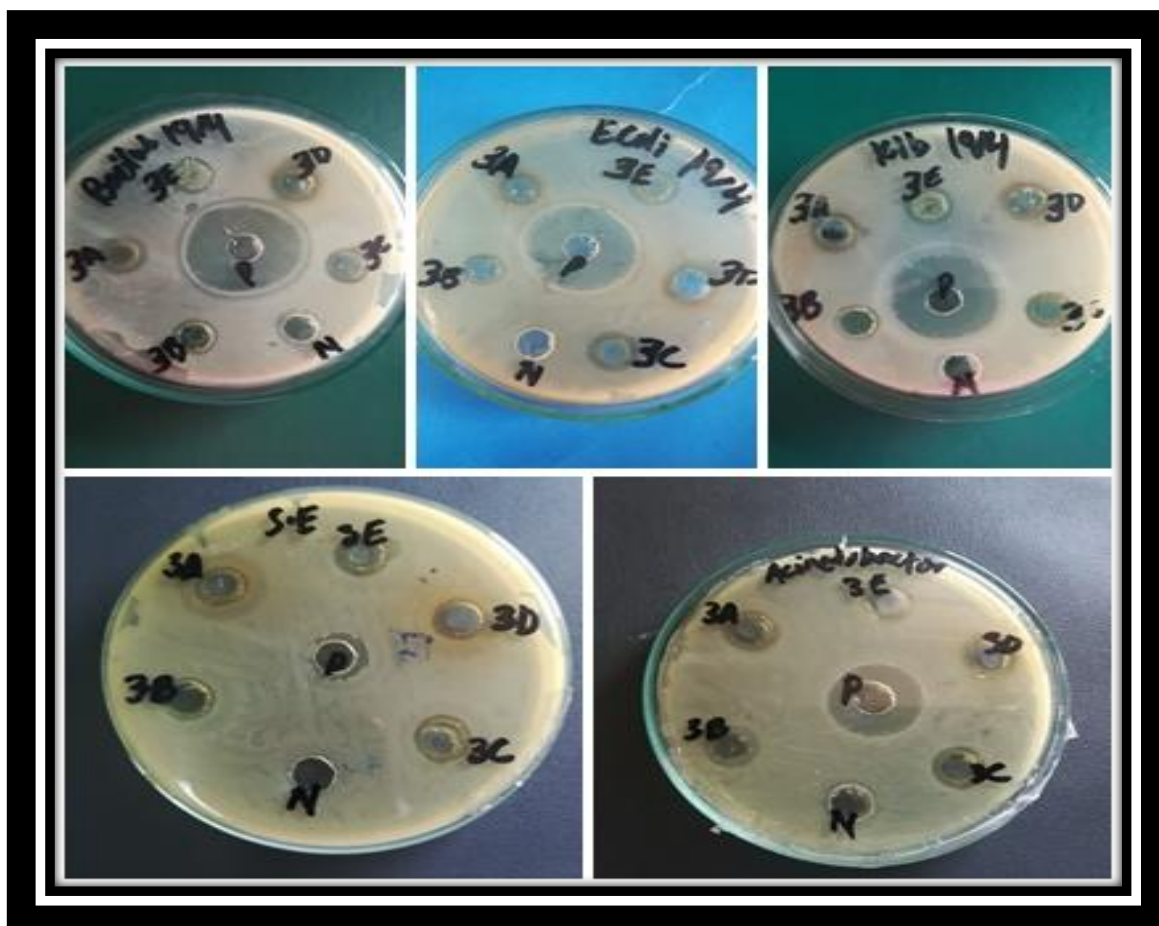

**Figure S3.** Antibacterial activity *Quercus semicarpifolia* extracts against infectious bacterial species.
